# Supplementary material for: „Terror awareness“ bei Humanmedizinstudierenden im 5. Jahr des Mannheimer Reformierten Curriculums Medizin plus
Source: Springer Nature journal article supplement (doi:10.1007/s00113-020-00808-4), 2020-04-28
Supplement: MOESM1 [file 17936654]

# FRAGEBOGEN VORLESUNG EINSATZMEDIZIN

## Teil I

*Bitte schätzen Sie Ihr Interesse und Ihre Kenntnisse am Thema Einsatzmedizin anhand der folgenden Fragen ein.*

1. Wie hoch ist jetzt, vor der Vorlesung, Ihr Interesse am Thema Operieren im Ausland/Einsatzmedizin?

sehr hoch      hoch      gering      sehr gering

☐☐☐☐

2. Verglichen mit anderen Modulen ist mein Interesse für diese Vorlesung...

größer      genau gleich      geringer

☐☐☐

3. Ich habe mich schon vor der Vorlesung über das Thema Operieren im Ausland/Einsatzmedizin informiert.

Trifft voll zu      trifft eher zu      trifft eher nicht zu      trifft gar nicht zu

☐☐☐☐

4. Mir ist bewusst, dass Management von Verletzungen durch Waffen oder Kampfmittel wie z. B. Splitter- oder Granatwunden größere Herausforderungen an die medizinische Versorgung stellen als andere Verletzungen.

Trifft voll zu      trifft eher zu      trifft eher nicht zu      trifft gar nicht zu

☐☐☐☐

5. In Deutschlands Krankenhäusern muss man sich auf die Behandlung von Opfern nach Terroranschlägen vorbereiten.

Trifft voll zu      trifft eher zu      trifft eher nicht zu      trifft gar nicht zu

☐☐☐☐

6. Ich kann mir eine Karriere bei der Bundeswehr vorstellen.

Trifft voll zu      trifft eher zu      trifft eher nicht zu      trifft gar nicht zu

☐☐☐☐

7. Persönliche Angaben:

**Geschlecht**    ☐ *m*      ☐ *w*    **Alter:.....**

*Vielen Dank für Ihre Teilnahme!*
