# Supplementary material for: „Terror awareness“ bei Humanmedizinstudierenden im 5. Jahr des Mannheimer Reformierten Curriculums Medizin plus
Source: Springer Nature journal article supplement (doi:10.1007/s00113-020-00808-4), 2020-04-28
Supplement: MOESM2 [file 17936654]

# FRAGEBOGEN VORLESUNG EINSATZMEDIZIN

## Teil II

---

*Bitte schätzen Sie Ihr Interesse und Ihre Kenntnisse am Thema Einsatzmedizin anhand der folgenden Fragen ein.*

---

1. Wie hoch ist jetzt, nach der Vorlesung, Ihr Interesse am Thema Einsatzmedizin?

sehr hoch      hoch      gering      sehr gering

                

---

2. Meine Erwartungen an die Vorlesung wurden erfüllt.

Trifft voll zu      trifft eher zu      trifft eher nicht zu      trifft gar nicht zu

                

---

3. Während der Vorlesung kamen Themen auf, die ich nun individuell vertiefen möchte.

Trifft voll zu      trifft eher zu      trifft eher nicht zu      trifft gar nicht zu

                

---

4. Mir ist bewusst, dass Management von Verletzungen durch Waffen oder Kampfmittel (wie z. B. Splitter- oder Granatwunden) größere Herausforderungen an die medizinische Versorgung stellen als andere Verletzungen.

Trifft voll zu      trifft eher zu      trifft eher nicht zu      trifft gar nicht zu

                

---

5. In Deutschlands Krankenhäusern muss man sich auf die Behandlung von Opfern nach Terroranschlägen vorbereiten.

Trifft voll zu      trifft eher zu      trifft eher nicht zu      trifft gar nicht zu

                

---

6. Ich kann mir eine Karriere bei der Bundeswehr vorstellen.

Trifft voll zu      trifft eher zu      trifft eher nicht zu      trifft gar nicht zu

                

---

7. Persönliche Angaben:

**Geschlecht**     *m*       *w*    **Alter:.....**

*Vielen Dank für Ihre Teilnahme!*
